# Supplementary material
Source: Springer Nature journal article supplement (https://www.springermedizin.de/resource/supplementary/12891_2013_1980_MOESM4_ESM.pdf/9508960)

**A**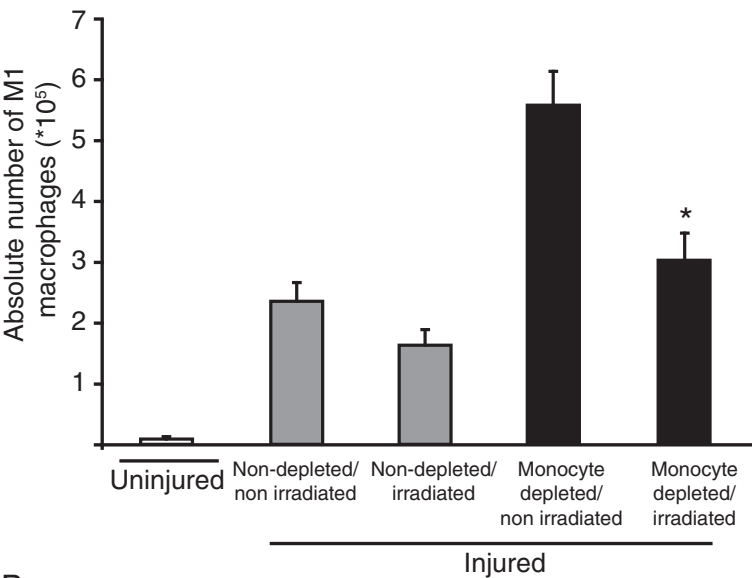**B**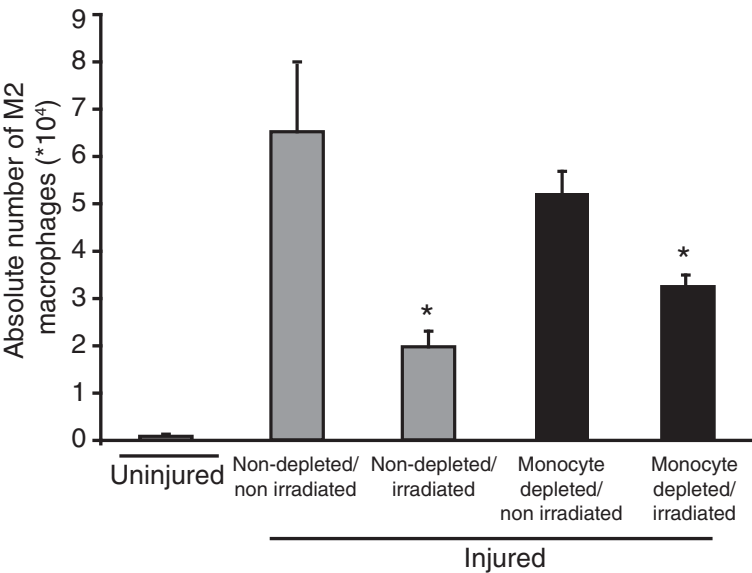

Supplement: MOESM4 [file 9508960]
